# Supplementary material for: One-step synthesis of nickel phosphide nanowire array supported on nickel foam with enhanced electrocatalytic water splitting performance
Source: Royal Society of Chemistry journal article supplement (doi:10.1039/c6ra20737e), 2016-01-01
Supplement: c6ra20737e1.pdf [file c6ra20737e1.pdf]

## Supporting Information

### **One-Step Synthesis of Nickel Phosphide Nanowires Array Supported on Nickel Foam with Enhanced Electrocatalytic Water Splitting Performance**

Jian Xiao<sup>†, #</sup>, Qiying Lv<sup>†, #</sup>, Yan Zhang<sup>†</sup>, Zheyue Zhang<sup>†</sup>, Shuai Wang<sup>†, §, \*</sup>

<sup>†</sup> State Key Laboratory of Digital Manufacturing Equipment and Technology. Key laboratory of Material Chemistry for Energy Conversion and Storage, Ministry of Education. School of Chemistry and Chemical Engineering, Huazhong University of Science and Technology, Wuhan 430074, P. R. China

<sup>§</sup> Flexible Electronics Research Center (FERC), School of Mechanical Science and Engineering, Huazhong University of Science and Technology, Wuhan 430074, P. R. China

<sup>#</sup> These authors contributed equally to this work.

E-mail: [chmsamuel@mail.hust.edu.cn](mailto:chmsamuel@mail.hust.edu.cn); Tel: +86 87792464

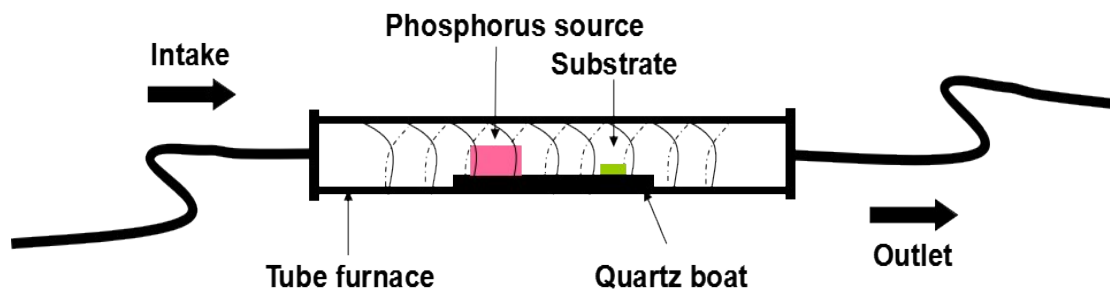

**Scheme S1.** Illustration of the one-step synthesis of Ni-P NA/NF

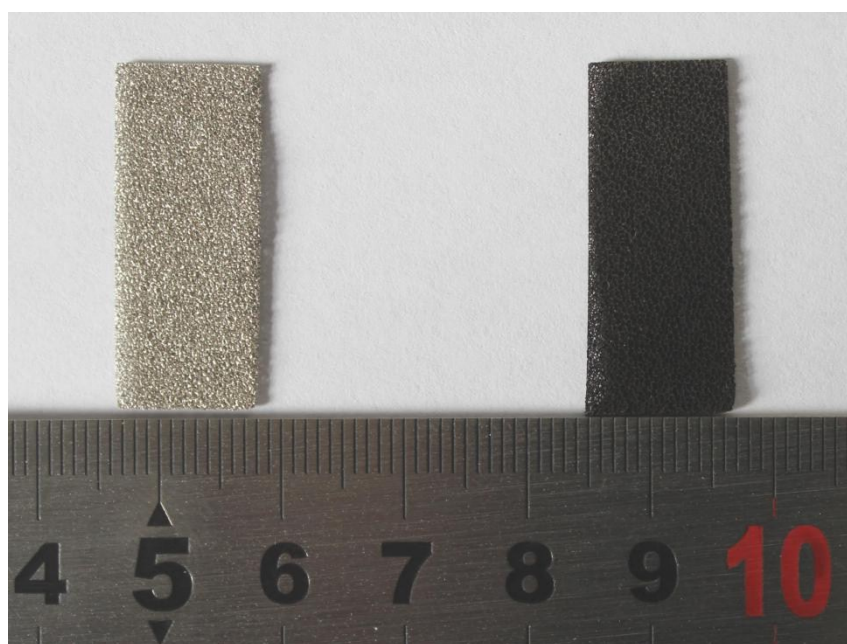

**Figure S1.** photograph of Ni foam before (left) and after (right) phosphorization treatment

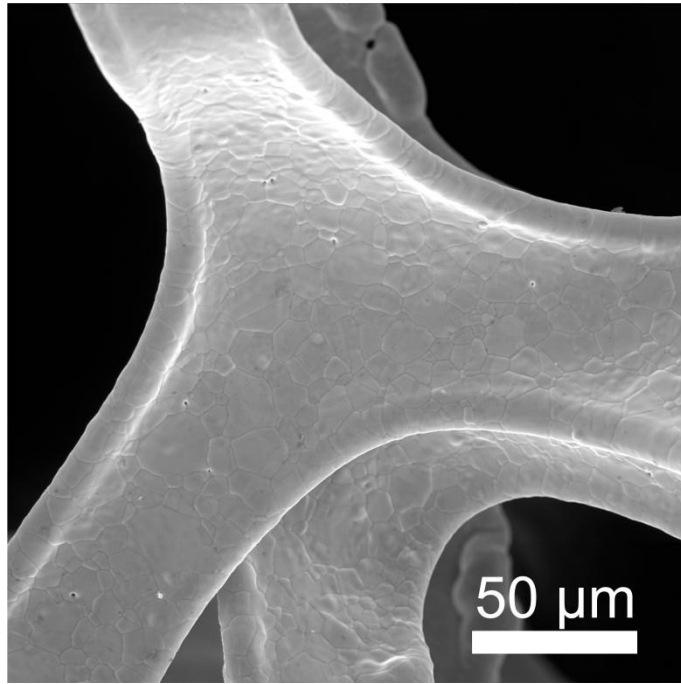

**Figure S2.** SEM image of the bare Ni foam

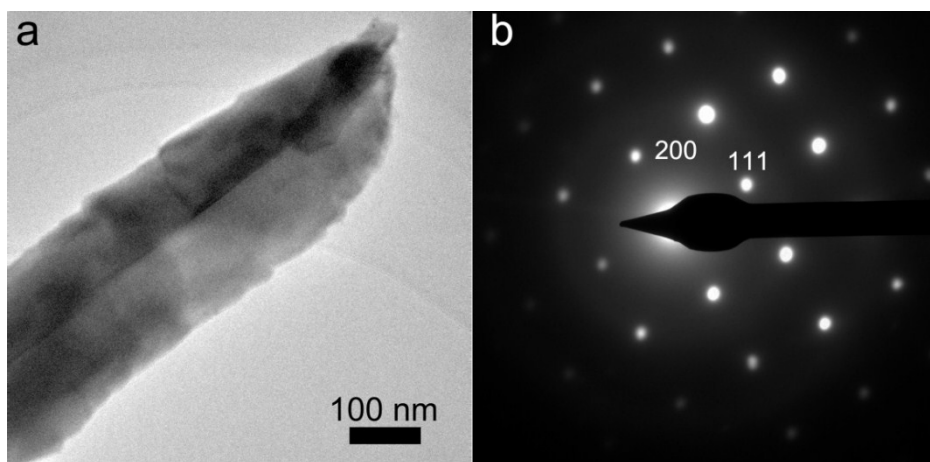

**Figure S3.** (a) TEM and (b) SAED pattern of the single nickel phosphide nanowire

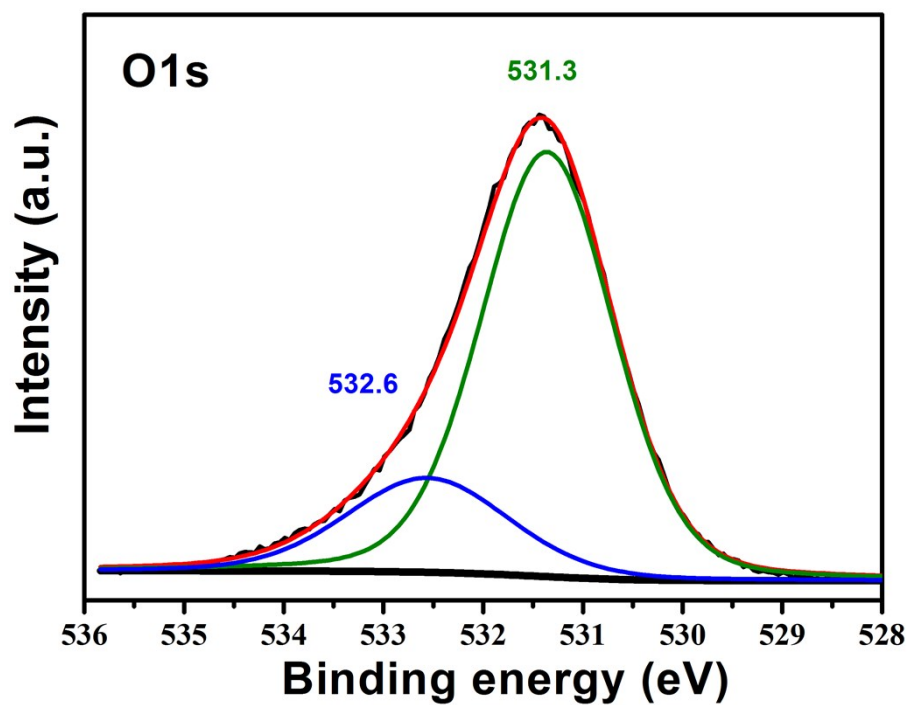

**Figure S4.** XPS in the region of O 1s orbit for Ni-P NA/NF electrode.

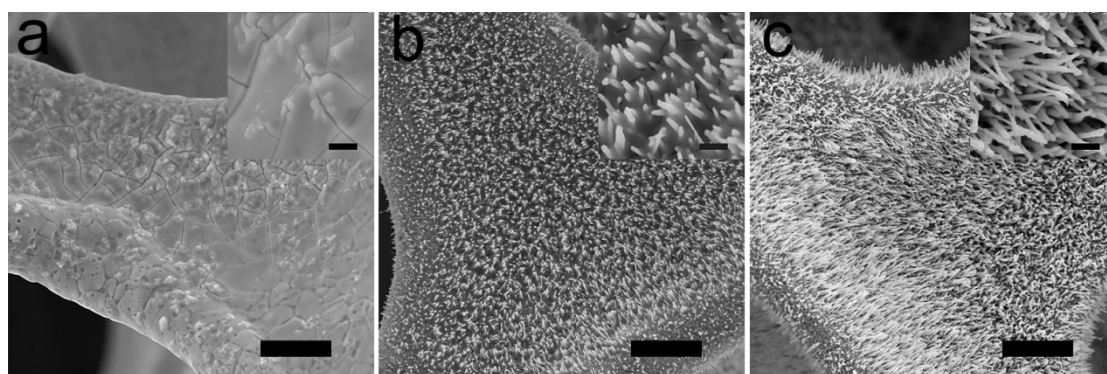

**Figure S5.** SEM images of the Ni foam phosphated for different time: (a) 6 min, (b) 15 min and (c)

30 min, all bars are 20 μm. (Inset: the corresponding enlargement, all bars are 2 μm)

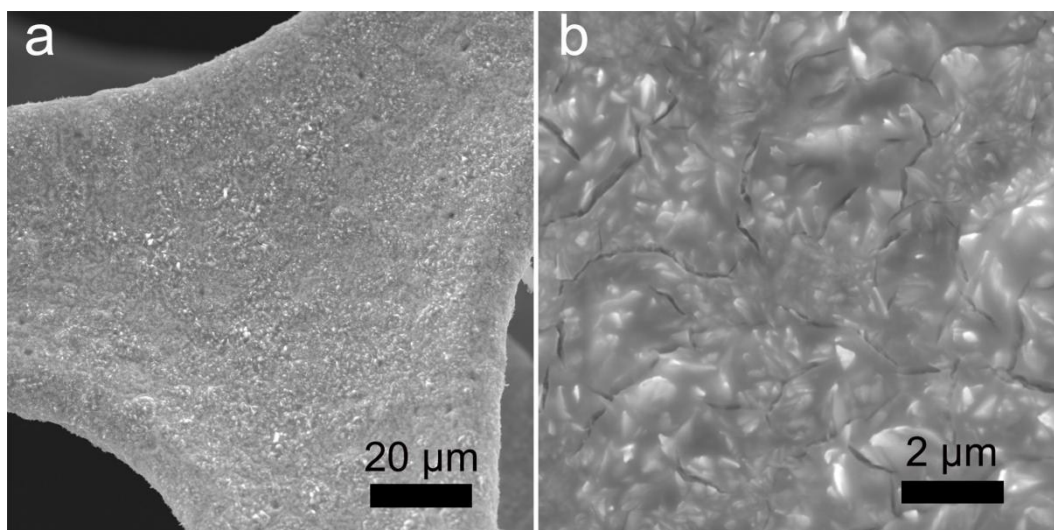

**Figure S6.** (a, b) SEM images of the Ni foam phosphated after oxidizing at 600 °C for 2 h in air atmosphere

**Table S1.** Comparison of electrocatalytic activity of some non-noble metal HER catalysts reported in the literature.

| Catalyst                            | Electrolyte                          | $\eta_{10}$<br>(mV vs. RHE) | $j_0$<br>(mA cm <sup>-2</sup> ) | Tafel<br>slope<br>(mV dec <sup>-1</sup> ) | Ref.             |
|-------------------------------------|--------------------------------------|-----------------------------|---------------------------------|-------------------------------------------|------------------|
| Ni-P NA/NF                          | 0.5 M H <sub>2</sub> SO <sub>4</sub> | 73                          | 0.85                            | 70.8                                      | <b>This work</b> |
|                                     | 1.0 M KOH                            | 148                         | 0.51                            | 115.2                                     |                  |
| Co <sub>2</sub> B                   | 1.0 M KOH                            | 106                         |                                 | 92.4                                      | 13               |
| Ni <sub>5</sub> P <sub>4</sub> Film | 0.5 M H <sub>2</sub> SO <sub>4</sub> | 140                         |                                 | 40                                        | 14               |

|                                                             |                                      |     |       |      |    |
|-------------------------------------------------------------|--------------------------------------|-----|-------|------|----|
|                                                             | 1.0 M KOH                            | 150 |       | 53   |    |
| Ni <sub>5</sub> P <sub>4</sub> -Ni <sub>2</sub> P nanosheet | 0.5 M H <sub>2</sub> SO <sub>4</sub> | 120 | 0.116 | 79.1 | 15 |
| CP@Ni-P                                                     | 0.5 M H <sub>2</sub> SO <sub>4</sub> | 98  | 0.24  | 58.8 | 16 |
|                                                             | 1.0 M KOH                            | 117 |       | 85.4 |    |
| NiP <sub>2</sub> NS/CC                                      | 0.5 M H <sub>2</sub> SO <sub>4</sub> | 75  | 0.26  | 51   | 17 |
| Ni <sub>2</sub> P nanoparticle                              | 0.5 M H <sub>2</sub> SO <sub>4</sub> | 126 | 0.033 | 46   | 22 |
| peapod-like Ni <sub>2</sub> P                               | 0.5 M H <sub>2</sub> SO <sub>4</sub> | 87  |       | 54   | 25 |
| Ni-doped graphene                                           | 0.5 M H <sub>2</sub> SO <sub>4</sub> | 152 | 0.053 | 45   | 32 |
| CoNi@NC                                                     | 0.1 M H <sub>2</sub> SO <sub>4</sub> | 142 |       | 105  | 33 |
| Core-shell MoO <sub>3</sub> -MoS <sub>2</sub>               | 0.5 M H <sub>2</sub> SO <sub>4</sub> | 255 | 0.082 | 55   | 34 |
| Co-NG                                                       | 0.5 M H <sub>2</sub> SO <sub>4</sub> | 147 | 0.125 | 82   | 36 |
| MoSe <sub>2</sub> /RGO                                      | 0.5 M H <sub>2</sub> SO <sub>4</sub> | 151 |       | 101  | 37 |
| WN NA/CC                                                    | 0.5 M H <sub>2</sub> SO <sub>4</sub> | 198 |       | 92   | 38 |
|                                                             | 1.0 M H <sub>2</sub> SO <sub>4</sub> | 285 |       | 170  |    |
| CP/CTs/Co-S                                                 | 1.0 M KOH                            | 190 | 0.39  | 131  | 48 |

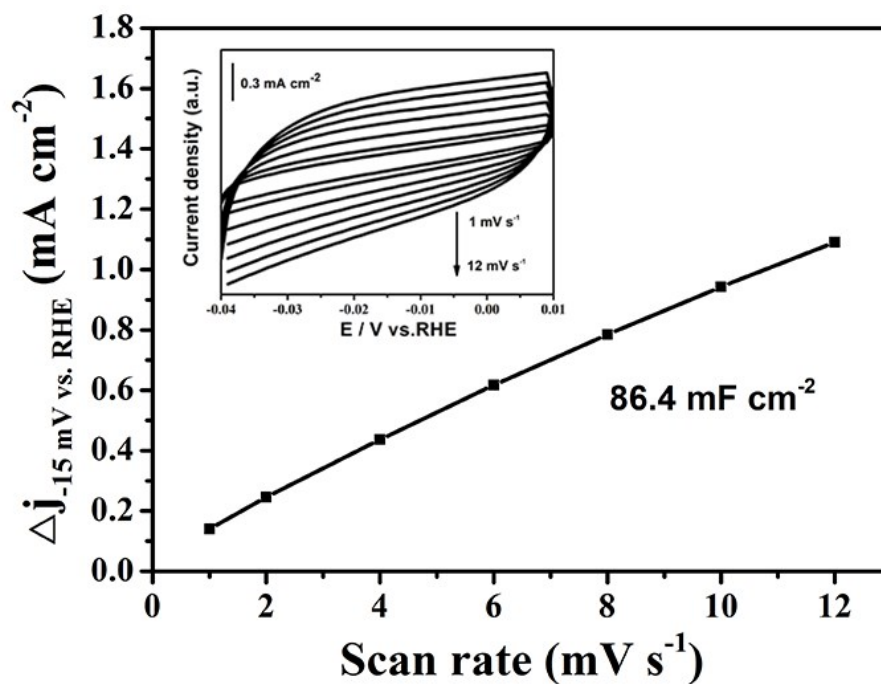

**Figure S7.** Plots of the current density versus the scan rate for Ni-P NA/NF (inset: cyclic voltammetry of Ni-P NA/NF measured at different scan rates from 1 to 12  $\text{mV s}^{-1}$ )

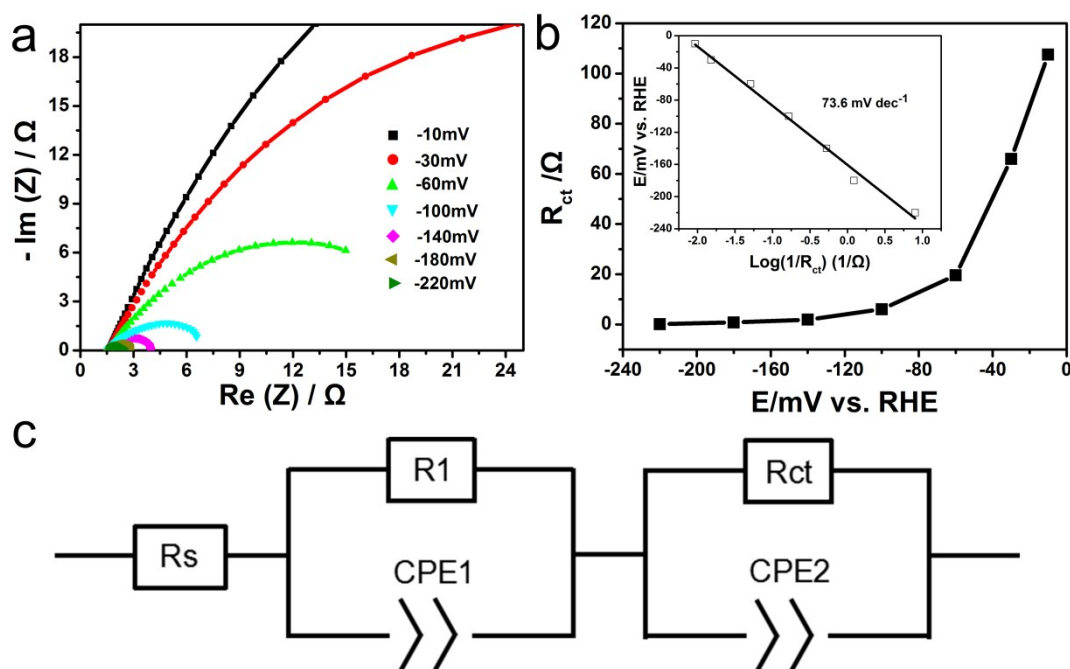

**Figure S8.** (a) Nyquist plots of electrochemical impedance spectroscopy (EIS) for Ni-P NA/NF electrode obtained at different overpotentials. (b) Dependence of the charge-transfer resistance

( $R_{ct}$ ) on the overpotential. Inset: overpotential versus  $\log(1/R_{ct})$ . (c) Equivalent circuit (2CPE model) used for fitting the Nyquist plots.

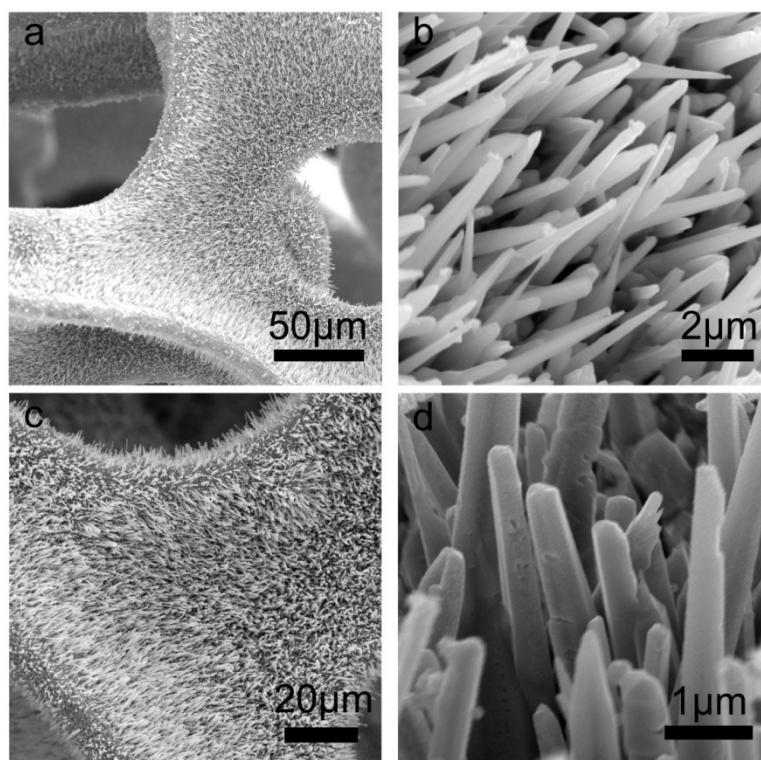

**Figure S9.** SEM images of the Ni-P NA/NF electrode after the long-term stability tests for (a, b) HER and (c, d) OER

**Table S2.** Comparison of electrocatalytic activity of some non-noble metal OER catalysts reported in the literature. (test in KOH)



| Catalyst                              | $\eta_{20}$<br>(mV vs. RHE) | Tafel slope<br>(mV dec <sup>-1</sup> ) | Ref.             |
|---------------------------------------|-----------------------------|----------------------------------------|------------------|
| Ni-P NA/NF                            | 357                         | 76.0                                   | <b>This work</b> |
| Co <sub>2</sub> B                     | 410                         | 45                                     | 13               |
| Ni <sub>2</sub> P nanowires           | 346                         | 47                                     | 23               |
| Ni-P/CF                               | 362                         | 120                                    | 24               |
| Co-P film                             | 375                         | 46                                     | 42               |
| N-CG-CoO                              | 373                         | 71                                     | 43               |
| N-doped graphene                      | 526                         | 156                                    | 44               |
| NiCo <sub>2</sub> O <sub>4</sub>      | 430                         | 61.6                                   | 45               |
| PCN-CFP                               | 430                         | 61.6                                   | 45               |
| Co@Co <sub>3</sub> O <sub>4</sub> /NC | 420                         |                                        | 46               |
| CP/CTs/Co-S                           | 326                         | 72                                     | 48               |
